# Supplementary material for: An Overview and Evaluation of Recent Machine Learning Imputation Methods Using Cardiac Imaging Data
Source: Preprints.org preprint supplement (doi:10.20944/preprints201612.0078.v1), 2016-12-15
Supplement: Supplementary file 1 [file supplementary]

Archive with 2 entries (2 files):
- CMEcho_dataset.csv
- supplementary.pdf
