# Supplementary material for: An Overview and Evaluation of Recent Machine Learning Imputation Methods Using Cardiac Imaging Data
Source: Preprints.org preprint supplement (doi:10.20944/preprints201612.0078.v1), 2016-12-15
Supplement: Supplementary file 1 [file supplementary › CMEcho_dataset.csv]

ID	Class	Age	Height	Weight	BSA	EDV(MOD-bp)	EDVIndex	ESV(MOD-bp)	ESVIndex	SV(MOD-bp)	SVIndex	FS	EF	Ao V2 max	Ao max PG	Ao root diam	IVSd	LV mass(C)d	LV mass(C)dI	LVIDd	LVIDs	LVPWd	MV A max vel	MV E max vel	MV E/A	PA V2 max	PA max PG	TR Max PG	TR Max vel	TV A max vel	TV E max vel	TV E/A	IVSdZScore	LVIDdZScore	LVPWdZScore	LVIDsZScore	LVmassdZScore
1	I	22	152	60	1.6							36		83	2.8	2.8	0.59	104	65	5.3	3.4	0.59	38	72	1.9	107	4.6	14	186	53	68		-3.45	2.79	-3.4	0.93	-0.14
2	P	19	160	74	1.8							47		137	7.6	2.8	3.8	582	323.3	4.2	2.2	1.2	39	94	2.4	156	9.7						32.6	-0.84	3.68	-4.16	5.33
3	P	18	176	73	1.9							49		169	11	2.2	1	182	95.8	5.3	2.7	0.85	38	87	2.3	84	2.9	22	232		49		0.94	1.53	-0.76	-1.49	0.66
4	N	17	176	72	1.9							42		110	4.8	2.8	0.95	164	86.3	5	2.9	0.89	32	96	3	86	3	13	181				0.44	0.74	-0.28	-0.86	0.16
5	N	17	179	101	2.2	120	54.54545455	44	20	76	34.54545455	37	63	123	6.1	2.6	0.88	185	84.1	5.6	3.5	0.88	44	100	2.3	91	3.3	17	209	34	47		-0.95	1.65	-1.02	-2.04	0.53
6	N	17	176	74	1.9	95	50	34	17.89473684	61	32.10526316	35	64	130	6.8	2.6	0.89	146	76.8	4.8	3.1	0.89	18	91	5	101	4.1	18	209	19	50		-0.27	0.15	-0.33	-0.46	-0.45
7	P	15	152	43	1.4	122	87.14285714	82	58.57142857	40	28.57142857	15	33	142	8	2	0.74	214	152.9	6.5	5.5	0.87	62	112	1.8	78	2.4	26	256	46	57		0.46	4.1	1.78	5.69	3.1
8	P	15	170	69	1.8							39		94	3.5	2.8	0.96	131	72.8	4.3	2.6	0.91	63			101	4	22	233	21	27		0.78	-1.46	0.98	-1.32	-0.54
9	I	16	188	78	2							43		84	2.8	2.7	0.99	160	80	5.1	3	0.76	42	65	1.5	113	5.1	18	213				0.2	-1.74	-0.89	-1.7	-0.9
10	N	14	152	49	1.4							31		94	3.5	2.4	0.61	86	61.4	4.4	3.1	0.71	31	72	2.3	96	3.7	15	193				-0.57	0.06	0.58	1.05	-1.19
11	I	15	180	90	2.1	125	59.52380952	43	20.47619048	82	39.04761905	29	66	100	4	2.6	0.89	158	75.2	4.9	3.5	0.94	36	79	2.2	70	1.9	17	206	32	46		-0.52	-2.86	-0.09	-1.02	-0.34
12	N	11	157	45	1.4	113	80.71428571	53	37.85714286	60	42.85714286		53	102	4.2	2.5	0.6	85	60.7	4.4		0.7	68	93	1.4	61	1.5			25	44		-0.62	0.1	0.54		-1.78
13	I	16		86								27		99	4	2.8	0.77	189		6.1	4.4	0.83	42	84	2	77	2.4	19	216	57	42
14	N	12										30		94	3.5	2.3	0.76	96		4.2	2.9	0.76	31	68	2.2	106	4.5	16	203
15	N	11	168	54	1.6	88	55	48	30	40	25	20	45			2.3	0.76	118	73.8	4.9	3.9	0.74	86	81	0.94	62	1.6	18	214		77		0.13	0.71	0.43	2.54	-0.95
16	P	9	143	28	1.1	62	56.36363636	26	23.63636364	36	32.72727273	31	58	110	4.9	1.9	0.54	87	79.1	4.8	3.4	0.63	57	86	1.5								-0.57	1.52	0.61	2.25	-0.26
17	N	20	167	47	1.5							42		121	5.9	2.2	0.68	83	55.3	4.4	2.6	0.6	49	107	2.2	92	3.4	15	192	26	58		-1.53	-0.01	-2.34	-1.46	-3.14
18	N	8	131	31	1.1							39		140	7.9	1.8	0.6	70	63.6	4.2	2.6	0.6	41	77	1.9	110	4.9			39	61		-0.04	0.23	0.4	0.17	-0.36
19	N	13		60		73		33		40		51	55	159	10	2.7	0.95	151		5.2	2.6	0.7		110		106	4.5				74
20	P	11	147	49	1.4							27		126	6.4	2	0.55	64	45.7	3.9	2.9	0.68	57	83	1.5	121	5.9	29	270	40	73		-1	-1.08	0.42	0.57	-2.45
21	P	19	179	62	1.8	76	42.22222222	33	18.33333333	43	23.88888889	31	57	113	5.1	2.6	0.6	122	67.8	5.5	3.8	0.68	26	58	2.2	80	2.6	17	208	27	66		-3.3	2.19	-2.41	1.73	-1.82
22	P	8	149	65	1.6	49	30.625	15	9.375	34	21.25	42	69	130	6.7		1.4	159	99.4	4.1	2.3	0.9	58	85	1.5	76	2.3	22	237	38	41		3.01	-1.03	1.48	-1.61	2.14
23	N	14	162	52	1.5							38		104	4.3	2.1	0.5	57	38	4.3	2.7	0.5	26	77	2.9	81	2.6	12	170	25	57		-1.69	-0.4	-1.46	-0.22	-5.36
24	N	17	183	66	1.9	72	37.89473684	22	11.57894737	50	26.31578947	38	69	121	5.9	2.3	0.79	77	40.5	3.7	2.3	0.74	95	100	1	75	2.2			41	37		-0.29	-3.37	-0.31	-2.6	-6.32
25	N	17	158	61	1.6							33		99	4	2.3	0.69	80	50	4.2	2.8	0.63	41	70	1.7	122	6			37	56		-0.34	-0.87	-0.44	-0.11	-2.28
26	N	7	121	23	0.88	53	60.22727273	25	28.40909091	28	31.81818182	38	53	165	11	1.3	0.6	62	70.5	4.2	2.6	0.5	103	182	1.8	101	4.1			79	84		0.28	0.78	-0.15	0.62	-0.19
27	I	15	162	53	1.6							35		127	6.4	2.3	0.77	104	65	4.7	3.1	0.64	39	101	2.6	136	7.4	18	215		75		0.3	0.46	-0.2	0.84	-1.09
28	P	5	116	19	0.78							28		134	7.2	1.8	0.35	18	23.1	2.8	2	0.35				121	5.9	25	252	40	98		-2.05	-2.83	-1.75	-1.1	-6.84
29	N	15	175	98	2.1							35		167	11	2.2	0.97	170	81	5.1	3.3	0.88	52	88	1.7	106	4.5	14	188	55	64		-0.25	-2.89	-0.61	-1.82	0.41
30	N	16	172	57	1.7	71	41.76470588	32	18.82352941	39	22.94117647	32	55	119	5.7	2.5	0.74	106	62.4	4.8	3.3	0.64	85	104	1.2						55		-0.13	0.27	-0.49	1.03	-2.03
31	P	14	164	58	1.6							38		113	5.1		0.47	72	45	4.8	2.9	0.55	25	106	4.2	99	3.9	19	216	20	55		-2.15	0.44	-1.16	0.14	-3.8
32	N	17	164	70	1.8							37		115	5.3	2.9	0.88	115	63.9	4.1	2.6	0.94	42	98	2.3	85	2.9			39	65		0.47	-1.73	1.26	-1.17	-0.71
33	N	13		84								39		143	8.4	2.5	0.89	139		5.2	3.2	0.65	54	90	1.7	115	5.3			39	58
34	N	15	185	68	1.9							28		131	6.8		0.7	153	80.5	6.1	4.4	0.65	58	91	1.6	74	2.2			34	59		-0.97	1.34	-1.13	2.31	-0.92
35	P	19	174	73	1.9							36		94	3.5		0.88	137	72.1	5.2	3.3	0.65				87	3						-0.42	1.34	-2.98	-0.06	-0.64
36	N	9	149	54	1.5							41		114	5.2	2.3	0.47	75	50	4.9	2.9	0.55	41	94	2.3	98	3.8	17	205	39	50		-1.86	1.06	-0.82	0.46	-1.69
37	P	12	154	32	1.2							31				2.3	0.6	94	78.3	4.6	3.2	0.74											-0.28	0.87	1.21	1.58	-0.88
38	N	17	158	57	1.6							40		130	6.8	2.4	0.85	160	100	5.1	3	0.94	28	94	3.4	98	3.9			42	57		0.72	1.22	1.75	0.54	1.45
39	N	16	163	75	1.8	88	48.88888889	35	19.44444444	53	29.44444444	37	60	131	6.8	2.3	0.5	77	42.8	5.1	3.2	0.5	30	107	3.6	89	3.2	15	192	22	60		-2.28	0.2	-2.16	0.28	-3.16
40	N	6	148	19	0.94							32		130	6.8	1.7	0.32	32	34	3.9	2.6	0.38	35	73	2.1	111	4.9	11	162	25	62		-2.76	-0.18	-1.72	0.44	-7.68
41	N	16	162	68	1.7	68	40	25	14.70588235	43	25.29411765	35	63	142	8.1	2.2	0.81	133	78.2	4.9	3.2	0.81	45	106	2.3	97	3.8	13	179	27	47		0.17	0.24	0.59	0.61	0.25
42	N	0.1667	52	4	0.22	7.9	35.90909091	3.5	15.90909091	4.4	20	34	56	104	4.3	1	0.29	9.2	41.8	2.3	1.5	0.25	94	109	1.2	98	3.9			82	53		-1.27	1.82	-1.45	1.7	-0.48
43	N	7	122	22	0.86	27	31.39534884	9.4	10.93023256	17.6	20.46511628		65	137	7.5	1.6							67	85	1.3	77	2.4	16	197	69	92
44	P	0.25	61	6	0.29	13	44.82758621	4.2	14.48275862	8.8	30.34482759	34	68	54	1.2		0.81	39	134.5	2.3	1.5	0.73	77	111	1.4			26	254				4.14	0.39	3.73	0.89	5.74
45	P	15	178	80	2	97	48.5	46	23	51	25.5	26	53	106	4.5		0.72	120	60	5.1	3.8	0.7	54	90	1.7	102	4.1			60	62		-1.08	-1.14	-1.06	0.62	-1.83
46	I	17	172	59	1.7	93	54.70588235	36	21.17647059	57	33.52941176	36	61	136	7.4	2.4	0.96	193	113.5	5.4	3.5	0.93	48	102	2.1	123	6.1			32	65		1.03	1.34	1.39	1.42	1.2
47	P	22	186	98	2.2							41.3		131.7	6.9	2.9	1.1	223.5	101.6	5.4	3.2	1.1	41	71.1	1.7	97.7	3.8			27.1	47.4		-0.13	0.87	-0.49	-0.24	0.26
48	N	17	185	71	1.9	102.1	53.73684211	30.5	16.05263158	71.6	37.68421053	37.1	70	112.9	5.1	2	0.9	229.9	121	5.8	3.7	1.1			1.9	93.8	3.6	20.7	215.8	40.5	56.3	1.4	0.1	0.55	1.47	0.72	1.1
49	N	19	164	46	1.5	53.4	35.6	30.4	20.26666667	23	15.33333333	26.4	43	85.1	2.9		0.88	145.6	97.1	4.8	3.5	0.91			1.2	58.2	1.4			70.1	66.1	0.94	0.14	1.23	0.46	1.71	0.53
50	N	9	152	62	1.6	54	33.75	18.1	11.3125	35.9	22.4375	37.6	66	131.5	6.9		0.7	92.3	57.7	4.3	2.6	0.8	70	120.1	1.7	78.5	2.5			58.4	63	1.1	-0.21	-0.52	0.89	-0.62	-0.79
51	N	14	163	84	1.9	55.6	29.26315789	19.9	10.47368421	35.7	18.78947368	34.5	64	130.9	6.9	2	0.8	145.8	76.7	5.2	3.3	0.8	57.3	65.6	1.1	87.9	3.1			77.9	91	1.2	-0.33	-0.23	-0.03	0.05	0.62
52	N	11	163	44	1.4	80	57.14285714	23	16.42857143	57	40.71428571	36.8	71	150.5	9.1		0.9	156.2	111.6	4.9	3.1	0.9	83.3	88.8	1.1	119.1	5.7			51.2	63.5		1.23	1.13	1.8	1.04	0.94
53	N	15	171	61	1.7							40		111	5	2.3	0.74	101	59.4	4.8	2.9	0.6	36	110	3	105	4.4	14	190	21	92		-0.22	0.09	-0.94	-0.12	-2.24
54	I	17	181	71	1.9	58	30.52631579	20	10.52631579	38	20	34	66	118	5.6	2.5	0.71	118	62.1	5	3.3	0.71	46	99	2.1	85	2.9	18	210	24	51		-0.92	-0.68	-0.68	0	-2.26
55	N	13	156	45	1.4	46.7	33.35714286	18.7	13.35714286	28	20	27.1	60	105.9	4.5	2	0.85	87.3	62.4	4	2.9	0.69			1.5	67.9	1.8			42	50.9	1.2	1.02	-0.84	0.48	0.56	-1.51
56	P	15	174	90	2	94.6	47.3	39.4	19.7	55.2	27.6	30.1	58	120.3	5.8	2	1	198.4	99.2	5.2	3.6	1			2	78.5	2.5	19.1	205.7	32.9	59.3	1.8	0.22	-1.65	0.49	-0.34	1.18
57	P	15	162	49	1.5	58.5	39	23.3	15.53333333	35.2	23.46666667	29.6	60	135.7	7.4	2	0.79	106.8	71.2	4.1	2.9	0.76			1.8	89.6	3.2	11.9		29.1	51.8	1.8	0.51	-0.78	0.8	0.41	-0.94
58	P	7	129	26	0.97	60.2	62.06185567	33	34.02061856	27.2	28.04123711	23.1	45.2	123.5	6.1		0.83	133.5	137.6	4.6	3.5	0.93				120.8	5.8				54.3		1.62	1.37	2.86	2.7	3.02
59	P	5	107	15.2	0.68	57.2	84.11764706	27.4	40.29411765	29.8	43.82352941	28.2	52.1	142.3	8.1	2	0.77	92.9	136.6	4.5	3.2	0.6			1.2	86.5	3			71	89.5	1.3	1.89	2.64	1.41	3.19	2.99
60	P	17	188	73	2	151	75.5	138.6	69.3	12.4	6.2	11	8.2	62.7	1.6		0.8	189.7	94.9	6.2	5.5	0.8	78	77.5	0.99			14.2	187.3				-0.6	0.8	-0.37	3.53	0.04
61	P	14		75		94.3		42.3		52			55.1	95	3.6	2.9							49.4	87.4	1.8	86.9	3	16.6	203.8	33.1	78
62	I	15	165	71	1.8	83	46.11111111	37.1	20.61111111	45.9	25.5	25.3	55	145.2	8.4		0.6	99.5	55.3	5.2	4	0.6	31.3	105.3	3.4	104.5	4.4			28	51.5	1.8	-1.36	0.54	-1.13	2.16	-1.68
63	N	8	124	26	0.95	61.6	64.84210526	27.4	28.84210526	34.2	36	28.7	56	99.7	4	2	0.7	72.9	76.7	4.4	3	0.5	26.3	74.8	2.8	60	1.4	13.6	184.4	33.2	44.8	1.3	0.88	1.01	-0.3	1.56	0.43
64	N	7		41		52.4		19.6		32.8			63	146	8.5								56.8	88.2	1.6	109.8	4.8			53.1	64.2	1.2
65	P	16	172	81	1.9	125.2	65.89473684	56.9	29.94736842	68.3	35.94736842	34.9	55	101.6	4.1		1	175.7	92.5	5.4	3.5	0.7	41.5	101.7	2.5	86	3	18.1	212.8	24.4	57.7	2.4	0.57	-0.22	0.9	0.24	0.79
66	P	15	160	59	1.6	181.9	113.6875	147	91.875	34.9	21.8125	5.8	19.2	114	5.2		0.8	314.2	196.4	6.8	6.4	1.3	42.8	61.4	1.4	122.4	6	33.1	287.8	54.8	69.1	1.3	0.36	3.98	3.35	6.44	3.78
67	N	15	180	63	1.8	71.8	39.88888889	27.6	15.33333333	44.2	24.55555556	37.9	62	140.2	7.9		0.76	153.1	85.1	5.5	3.4	0.79			3.4	110.2	4.9	15.5	196.2	27.1	69.6	2.6	-0.32	0.98	0.23	0.78	-0.52
68	N	14	180	58	1.7	108.8	64	36.6	21.52941176	72.2	42.47058824	44	66	119.3	5.7		0.9	129.7	76.3	4.9	2.8	0.68			1.5	142.9	8.3			45.9	96	2.1	0.62	0.16	-0.36	-0.5	-1.51
69	N	0.0082	52	3.2	0.21	5.6	26.66666667	2.7	12.85714286	2.9	13.80952381	36.8	52	86.3	3.1		0.34	11	52.4	2.2	1.4	0.33			1.6	70.7	2.1	31.6		40	40.5	1	-0.26	1.87	0.39	1.41	0.86
70	I	15	184	70	1.9	63.8	33.57894737	21.7	11.42105263	42.1	22.15789474	33.8	66	150.8	9.1	2	0.91	128.8	67.8	4.4	2.9	0.91			1.2	146	8.5			100.6	95	0.94	0.21	-2.05	0.56	-1.09	-1.95
71	N	2.5833	93	9.8	0.51	21.4	41.96078431	10.4	20.39215686	11	21.56862745	28.2	51.5	105	4.4	2	0.48	32.4	63.5	3.3	2.4	0.5			0.81	70	2			34.7	43.2	1.2	-0.58	2.28	0.52	4.18	1.32
72	I	17	180	126	2.4	116.8	48.66666667	48.8	20.33333333	68	28.33333333	38.5	58	134.7	7.3		1.6	359.6	149.8	5.2	3.2	1.5			0.56	123.8	6.1			93.8	77.9	0.83	0.68	-7.92	0.19	-6.03	2.85
73	P	0.011	50	3.4	0.21	4.5	21.42857143	2.9	13.80952381	1.6	7.619047619	14.3	36	70.9	2	2	0.36	12.1	57.6	2.3	1.9	0.32			0.83	79.3	2.5	33.4	289	71.4	57.6	0.81	-0.01	2.29	0.18	4.18	1.17
74	N	0.0219	52	3	0.2	6	30	2.5	12.5	3.5	17.5	33.6	58.8	123.8	6.1	2	0.43	17.9	89.5	2.6	1.7	0.36			2.9	131.8	6.9			16	95.9	6	1.03	3.97	0.96	3.17	3.29
75	P	17	173	79	1.9							35	61.6	123.1	6.1	2	0.84	179.5	94.5	5.6	3.6	0.88			2.4	127.9	6.5			29	54.6	1.9	-0.2	0.25	0.34	0.54	0.81
76	P	11	153	52	1.5	42.7	28.46666667	10.9	7.266666667	31.8	21.2	38.3	74	134.4	7.2	2	0.8	96.1	64.1	4.2	2.6	0.8	41.1	111.9	2.7	95	3.6			20.7	49.4	2.4	0.62	-0.49	1.12	-0.41	-0.66
77	N	16	170	61	1.7	129.2	76	55.7	32.76470588	73.5	43.23529412	39	57	127.6	6.5		0.86	173.6	102.1	5.1	3.1	1			1.3	104.1	4.3	24.5	247.3	50	43.8	0.88	0.49	0.73	1.74	0.43	0.88
78	I	15	173	64	1.8	123	68.33333333	49	27.22222222	74	41.11111111	30	60	120	5.8	2.3	0.86	120	66.7	4.5	3.2	0.79	84	77	0.91	92	3.4			69	54		0.36	-0.81	0.35	0.47	-1.33
79	P	14	180	60	1.8	155.9	86.61111111	104.5	58.05555556	51.4	28.55555556	15.7	33	76.6	2.3	2	1	247.1	137.3	6.2	5.2	0.9			1.4	60.1	1.4	23.9	244.3	27.8	37.7	1.4	1.05	2.39	1.02	4.29	1.67
80	N	14	167	78	1.9	59.3	31.21052632	21.6	11.36842105	37.7	19.84210526	27.5	63.6	120.3	5.8		0.7	99	52.1	4.7	3.4	0.7	45	81.4	1.8	88.3	3.1	17	206.3	38.4	55.4		-0.88	-1.04	-0.63	0.44	-1.93
81	P	7	132	34	1.1	20.8	18.90909091	6.8	6.181818182	14	12.72727273	43.3	67	134.4	7.2	2	3.2	191.8	174.4	2.6	1.5	0.5	47.3	80.4	1.7	126.1	6.4	18.1	212.9	63.8	59.6	0.93	7.68	-4.67	-0.64	-4.27	4.36
82	P	1.6667	84	10	0.47							25.9		110.2	4.9	1.5	0.5	32.7	69.6	3.2	2.4	0.5	51.7	77.6	1.5	112.7	5.1	12.8	177.3	30.3	42.4		-0.24	2.06	0.6	4.33	1.61
83	N	17	180	79	2	148.6	74.3	55.3	27.65	93.3	46.65	32.8	62.8	134.4	7.2	2	0.84	200.9	100.5	5.9	4	0.89			2.5					41	61.1	1.5	-0.38	0.26	0.16	0.99	0.84
84	P	16	154	43	1.4	53	37.85714286	18	12.85714286	35	25	36	66	122	5.9		0.65	84	60	4.5	2.9	0.62	41	100	2.5	86	2.9	22	236	41	68		-0.17	0.4	0	0.61	-1.53
85	P	16	183	135	2.5	120.1	48.04	37.4	14.96	82.7	33.08	30.3	69	96.4	3.7		1.2	311.8	124.7	6.2	4.3	1.1			2.2	84.2	2.8			41.3	52.4	1.3	-1.29	-8.72	-2.34	-5.64	2.29
86	N	13	160	48	1.5	55.5	37	18.8	12.53333333	36.7	24.46666667	32.3	66	113.7	5.2		0.8	103.2	68.8	4.2	2.9	0.8	58.9	98.9	1.7	107.2	4.7			21	50.5	2.4	0.62	-0.48	1.12	0.46	-0.94
87	N	10	137	40	1.2							38.5		105.9	4.5	2	0.7	72.4	60.3	3.9	2.4	0.6	69.6	76	1.1	93.1	3.5			101.7	100.2	0.99	0.43	-0.8	0.1	-0.71	-0.71
88	N	15	180	92	2.1	148.5	70.71428571	81.2	38.66666667	67.3	32.04761905	20.4	45	137.3	7.7	2	1.1	281.9	134.2	6.5	5.2	0.9			1.4	91.7	3.4	26.4	209.8	29.5	53.3	1.8	0.4	-0.28	-0.42	1.91	2.13
